# Supplementary material
Source: Springer Nature journal article supplement (https://www.springermedizin.de/resource/supplementary/13195_2013_276_MOESM1_ESM.pdf/9688388)

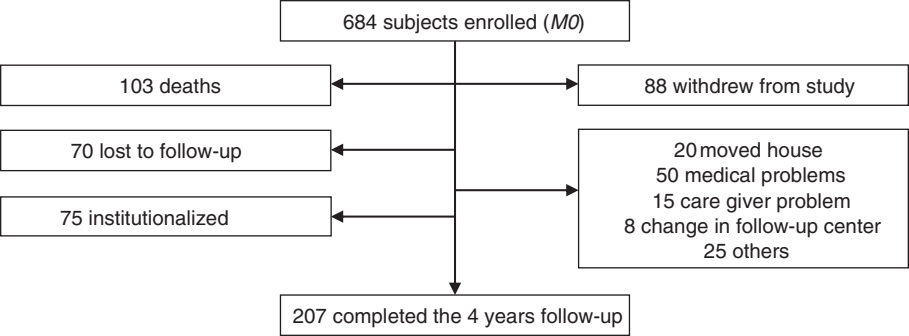

Supplement: MOESM1 [file 9688388]
